# Supplementary material
Source: publisher figshare collection journal article supplement (https://karger.figshare.com/ndownloader/files/13310228)
Supplement: Supplementary file 1 [file 13310228]

**Supplementary Tables**

**Table 1. Non-amnestic cognitive function of the study participants**

|  | **Control Group**  **(n=38)** | **aMCI group**  **(n=34)** | ***P* value** |
| --- | --- | --- | --- |
| **CERAD-K VF** | 14.8 ± 3.9 (9-23) | 12.7 ± 3.5 (7-21) | 0.016* |
| **CERAD-K BNT** | 12.0 ± 1.7 (8-15) | 9.8 ± 2.4 (5-15) | < 0.001† |
| **CERAD-K CP** | 10.3 ± 1.1 (7-11) | 9.6 ± 1.6 (5-11) | 0.066 |

CERAD-K, Korean version of Consortium to Establish a Registry for Alzheimer’s Disease; VF, Verbal Fluency; BNT, 15-item Boston Naming Test; CP, Constructional praxis. **p* < 0.05, †*p* < 0.001
